# Supplementary material
Source: publisher figshare collection journal article supplement (https://acs.figshare.com/ndownloader/files/13806008)
Supplement: Supplementary file 1 [file 13806008]

## Supporting Information

### Single-Walled Carbon Nanotubes Wrapped CoFe<sub>2</sub>O<sub>4</sub> Nanorods with Enriched Oxygen Vacancies for Efficient Overall Water Splitting

*Yu Ding<sup>‡</sup>, Jun Zhao<sup>‡</sup>, Wenqing Zhang<sup>‡</sup>, Jian Zhang, Xijie Chen, Fengchun Yang\*, and Xin Zhang\**

Key Laboratory of Synthetic and Natural Functional Molecule Chemistry of Ministry of Education, National Demonstration Center for Experimental Chemistry Education, College of Chemistry & Material Science, Northwest University, Xi'an 710127, China.

#### **Corresponding Author**

\*E-mail: fyang@nwu.edu.cn (F. Yang), zhangxin@nwu.edu.cn (X. Zhang)

**Table S1.** Content of different elements in  $\text{CoFe}_2\text{O}_4$  carbon nanorods

| Element | Co      | Fe      | O       |
|---------|---------|---------|---------|
| Content | 14.471% | 28.304% | 57.225% |

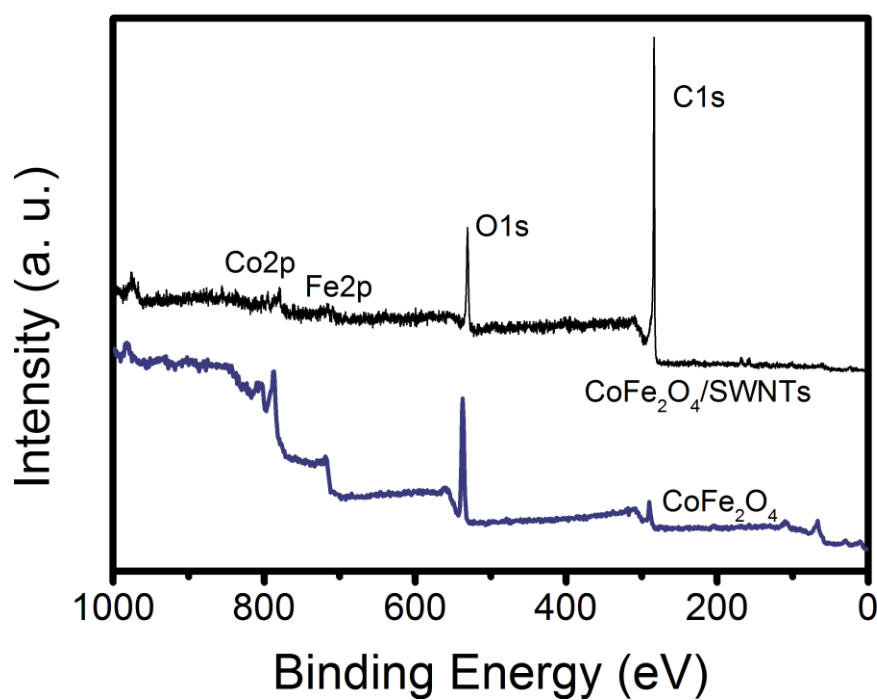

**Figure S1.** XPS survey spectra of the  $\text{CoFe}_2\text{O}_4$  and  $\text{CoFe}_2\text{O}_4/\text{SWNTs}$ .

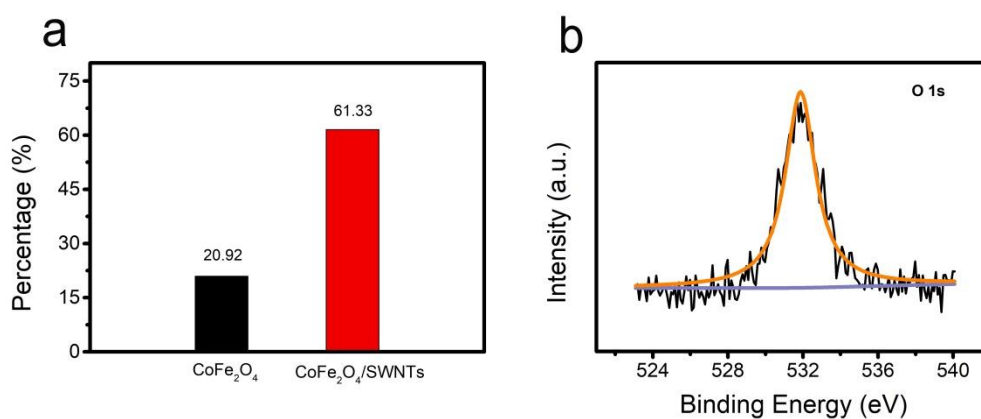

**Figure S2.** (a) The percentage of O2 in O 1s XPS spectrum of  $\text{CoFe}_2\text{O}_4$  (black) and  $\text{SWNTs}/\text{CoFe}_2\text{O}_4$  (red). (b) the O 1s spectrum of the SWNTs.

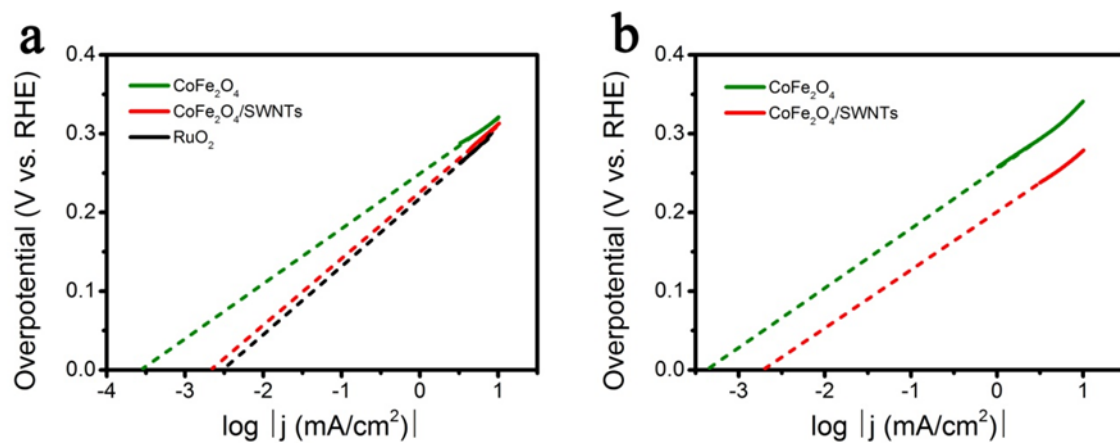

**Figure S3.** Exchange current densities for OER (a) and HER (b) calculated from Tafel plots by extrapolation method.

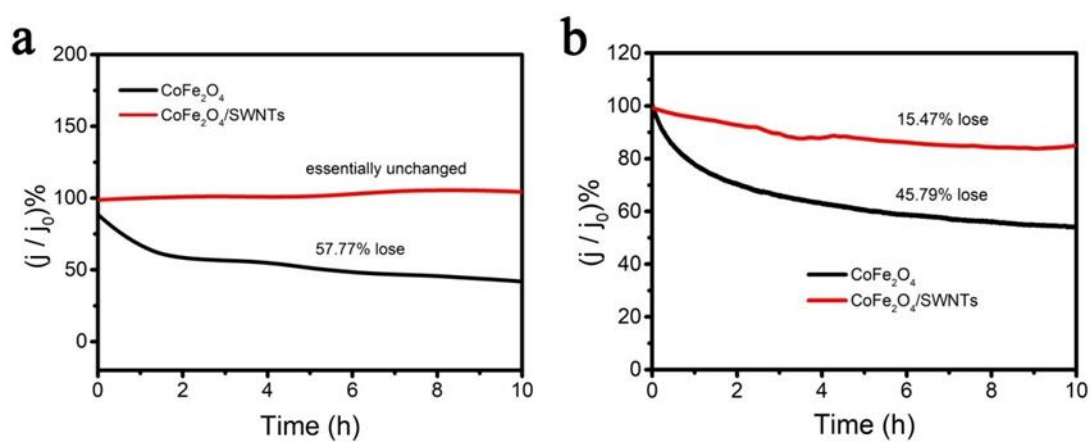

**Figure S4.** I-t curves of the  $\text{CoFe}_2\text{O}_4/\text{SWNTs}$  and  $\text{CoFe}_2\text{O}_4$  catalysts for OER (a) and HER (b) in 1.0 M KOH.

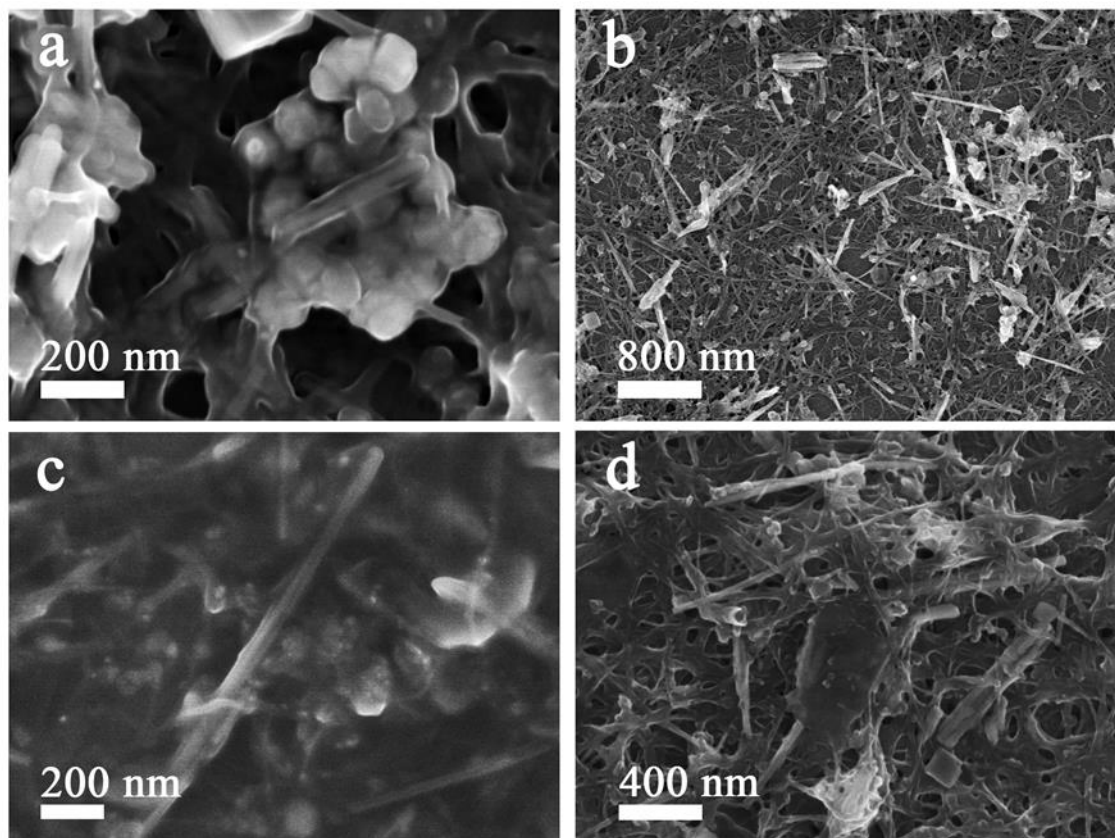

**Figure S5.** (a, b) SEM images of the  $\text{CoFe}_2\text{O}_4$  nanorods and  $\text{CoFe}_2\text{O}_4/\text{SWNTs}$  composites after stability tests for OER. (c, d) The SEM images of the  $\text{CoFe}_2\text{O}_4$  nanorods and  $\text{CoFe}_2\text{O}_4/\text{SWNTs}$  composites after stability tests for HER in 1.0 M KOH.

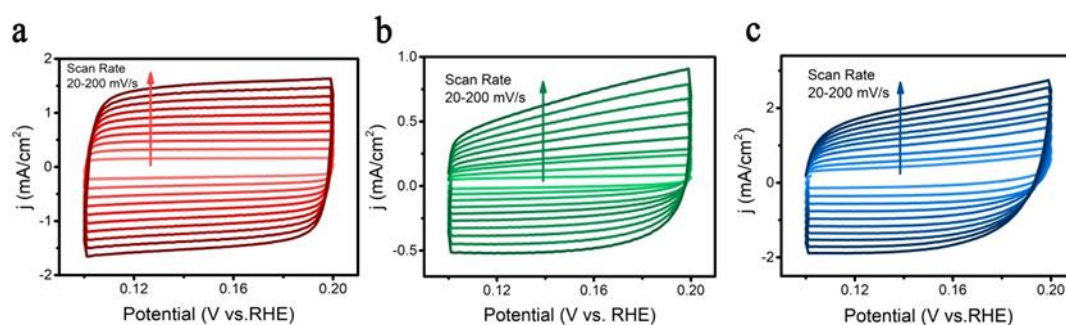

**Figure S6.** CV curves at various scan rates of a)  $\text{CoFe}_2\text{O}_4/\text{SWNTs}$  and b)  $\text{CoFe}_2\text{O}_4$ , c) SWNTs, in the range of 0.1-0.2 V vs. RHE

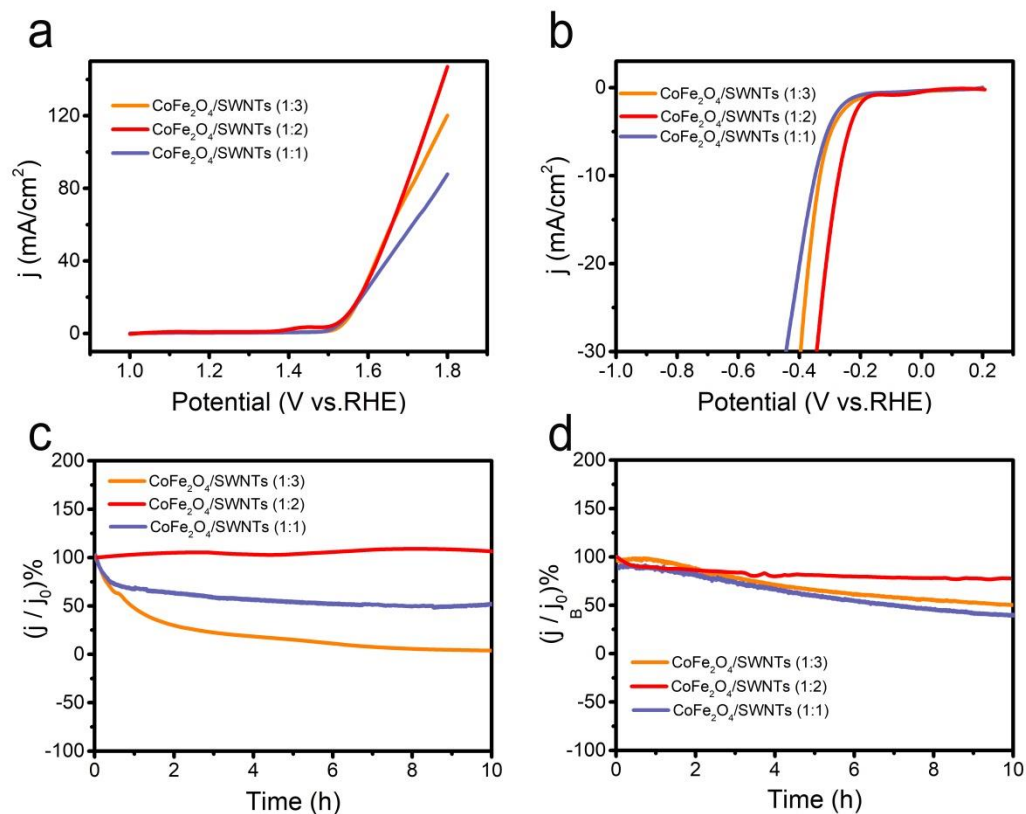

**Figure S7.** The polarization curves of (a) OER and (b) HER of different proportions of SWNTs/CoFe<sub>2</sub>O<sub>4</sub> in 1.0 M KOH, and the loadings of different catalysts for electrochemical tests are all 20uL with concentration of 2mg/mL. I-t curves of the different proportions of CoFe<sub>2</sub>O<sub>4</sub>/SWNTs catalysts for (c) OER and (d) HER in 1.0 M KOH.
